# Supplementary material for: The relationships between bilingual learning, willingness to study abroad and convergent creativity
Source: PeerJ. 2019 Sep 26;7:e7776. doi: 10.7717/peerj.7776 (PMC6766371; doi:10.7717/peerj.7776)
Supplement: Supplemental Information 2 [file peerj-07-7776-s002.xlsx]

## Sheet: Basic information 
Number	Gender	Age	registered permanent residence	income	language	language proficiency	time	Short-term overseas	Number of Short-term overseas	Long-term overseas	willingness to study abroad	Short-term overseas of parents	Long-term overseas of parents	theory
1	2	25	1	8000	1	2	3	2	0	2	2	2	2	1
2	2	25	1	20000	1	2	3	1	2	1	0	2	2	2
3	1	25	2	12000	1、5	3	3	2	0	2	1	2	2	1
4	2	19	1	5000	1	3	3	2	0	2	1	2	2	2
5	2	25	1	4500	1	3	2	2	0	2	1	2	2	1
6	1	25	2	3000	1	4	3	2	0	2	2	2	2	2
7	2	26	1	18000	1、5	3	4	1	1	2	1	2	2	1
8	2	22	1	8000	1	3	2	2	0	2	1	1	1	1
9	2	23	1	6000	1、5	1	4	2	0	2	1	2	2	1
10	1	19	1	20000	1	4	2	1	3	2	1	1	1	1
11	2	19	1	10000	1	4	2	2	0	2	1	1	2	1
12	2	20	1	5000	1、4、5	3	3	2	0	2	1	2	2	1
13	2	20	1	10000	1	3	2	2	0	2	1	1	2	1
14	2	20	1	5000	1、3	4	3	2	0	2	1	2	2	1
15	2	20	2	6500	1	3	3	2	0	2	2	2	2	1
16	2	20	2	10000	1	4	3	2	0	2	2	2	2	2
17	2	20	2	5000	1	3	3	2	0	2	2	2	2	1
18	2	20	1	16000	1	3	2	1	1	2	2	1	2	1
19	2	19	1	17000	1、4	2	2	1	2	2	1	1	2	2
20	2	19	1	5000	1	4	3	2	0	2	2	2	2	1
21	2	21	2	2000	1	4	3	2	0	2	2	2	2	2
22	2	19	2	4000	1	4	3	2	0	2	2	2	2	1
23	2	21	2	8500	1	3	3	2	0	2	2	2	2	1
24	2	21	2	3000	1	3	4	2	0	2	1	2	2	2
25	2	20	1	20000	1	4	2	2	0	2	1	2	2	1
26	2	21	2	4000	1	3	3	2	0	2	1	2	2	1
27	2	19	2	12000	1	3	3	2	0	2	1	2	2	1
28	1	24	1	10000	1	4	3	1	1	2	2	2	2	1
29	1	21	2	4000	1	3	3	2	0	2	2	2	2	1
30	2	21	2	3000	1	3	3	2	0	2	1	2	2	1
31	2	20	2	4000	1	3	3	2	0	2	1	2	2	1
32	2	20	1	10000	1	4	2	1	1	2	1	2	2	1
33	2	20	2	5000	1	3	3	2	0	2	2	1	2	1
34	2	20	2	9000	1	3	3	2	0	2	2	2	2	1
35	1	21	2	12000	1	3	3	2	0	2	2	2	2	1
36	2	20	1	8000	1	3	2	2	0	2	1	2	2	1
37	2	20	1	20000	1、4	3	2	1	2	1	2	1	1	2
38	1	22	1	4000	1	3	3	2	0	2	2	2	2	1
39	2	19	1	10000	1、4	3	3	2	0	2	2	2	2	1
40	2	20	2	4000	1	3	3	2	0	2	2	1	2	2
41	1	20	1	8000	1	4	3	2	0	2	2	2	2	1
42	2	20	2	5000	1	4	3	2	0	2	2	2	2	1
43	1	20	1	16000	1	3	2	2	0	2	1	2	2	1
44	1	20	2	6000	1	4	3	2	0	2	2	2	2	1
45	2	21	1	3000	1	4	3	2	0	2	2	2	2	1
46	2	22	2	3000	1	4	3	2	0	2	1	2	2	1
47	2	20	2	3000	1	3	3	2	0	2	2	2	2	1
48	1	20	2	3000	1	4	3	2	0	2	2	2	2	1
49	2	21	2	2800	1、4	4	3	2	0	2	2	2	2	1
50	2	22	2	4000	1	3	3	2	0	2	1	2	2	1
51	1	20	1	10000	1	4	2	2	0	2	2	2	2	1
52	1	22	1	9000	1	4	3	2	0	2	2	2	2	1
53	1	21	2	2000	1	4	3	2	0	2	2	2	2	1
54	1	20	1	10000	1	3	2	2	0	2	1	2	2	1
55	2	22	2	8000	1	4	3	2	0	2	2	2	2	1
56	2	21	2	7000	1	3	3	2	0	2	2	2	2	1
57	1	20	1	10000	1	3	2	2	0	2	1	2	2	1
58	1	20	1	80000	1	3	2	1	1	2	1	1	1	1
59	1	19	1	20000	1、4、6	3	3	2	0	2	1	1	2	1
60	1	21	1	12000	1	3	1	2	0	2	2	2	2	1
61	1	18	2	5000	1	5	3	2	0	2	2	2	2	1
62	1	18	2	5000	1	4	3	1	1	2	2	1	2	1
63	1	18	2	6000	1	4	3	2	0	2	2	2	2	1
64	1	16	1	6000	1	4	2	2	0	2	2	2	2	1
65	1	17	2	3000	1	4	3	2	0	2	2	2	2	1
66	1	17	2	12000	1	4	2	2	0	2	2	2	2	1
67	1	16	2	4000	1	4	3	2	0	2	2	2	2	1
68	1	18	2	8000	1	5	4	2	0	2	2	2	2	1
69
70	1	15	2	5000	1	4	3	2	0	2	2	2	2	1
71	1	17	2	5000	1	4	3	2	0	2	2	2	2	1
72	1	18	2	4000	1	4	3	2	0	2	1	2	2	1
73	1	21	2	4000	1	4	3	2	0	2	1	2	2	1
74	1	21	1	6000	1	3	3	2	0	2	1	2	2	1
75	1	21	2	7000	1	3	3	2	0	2	2	2	2	1
76	1	20	2	7000	1	4	3	2	0	2	2	2	2	1
77	1	20	2	5000	1	4	1	2	0	2	2	1	2	1

## Sheet: PANAS
Number	t1	t2	t3	t4	t5	t6	t7	t8	t9	t10	t11	t12	t13	t14	t15	t16	t17	t18	t19	t20	PA	NA
1	4	1	3	2	3	1	1	1	4	1	1	3	1	4	3	4	4	3	3	1	33	15
2	4	4	3	3	3	4	3	2	4	3	2	4	4	3	4	4	4	3	3	4	35	33
3	3	1	1	1	1	1	1	1	1	1	3	3	3	1	2	2	4	4	1	2	18	19
4	5	2	4	2	4	3	1	1	5	4	2	1	2	3	3	4	4	3	4	2	38	21
5	5	3	3	4	2	4	4	3	4	2	5	5	4	3	3	2	4	4	2	4	32	38
6	3	5	3	4	5	5	1	1	4	4	2	3	1	4	4	5	4	2	4	1	39	26
7	5	1	3	1	3	1	1	1	5	1	1	1	1	5	1	3	3	2	4	1	33	11
8	4	1	3	2	3	1	1	1	4	3	1	1	1	4	2	3	4	1	4	1	33	12
9	3	2	3	2	3	1	1	4	3	2	3	3	2	3	3	4	4	2	3	2	31	22
10	5	1	3	1	2	1	1	1	3	2	1	1	1	1	4	3	5	2	3	1	28	14
11	5	1	1	1	1	1	1	1	4	2	1	1	1	3	1	4	4	1	3	1	28	10
12	4	1	4	1	5	1	1	1	5	5	2	4	1	5	4	5	5	3	4	1	46	16
13	5	1	4	1	3	1	1	1	5	3	1	1	1	4	1	4	4	1	4	1	37	10
14	4	2	4	2	3	1	2	1	4	2	1	1	1	4	1	3	3	1	4	1	32	13
15	4	3	4	3	2	3	2	1	3	4	2	3	2	4	3	4	4	2	4	3	36	24
16	3	2	3	4	2	1	1	1	3	2	1	1	1	2	1	3	4	2	4	1	27	15
17	4	2	4	1	4	1	2	1	4	3	4	4	1	4	5	5	5	4	4	3	41	24
18	4	1	3	1	3	1	1	1	5	3	2	3	1	2	2	4	4	2	4	1	35	13
19	3	3	2	4	4	3	3	4	2	3	4	4	2	3	3	2	2	4	2	3	27	33
20	4	2	3	1	4	1	1	1	4	2	1	2	1	3	4	3	3	2	4	1	32	15
21	3	1	2	1	3	1	1	1	4	1	4	3	1	1	1	3	2	1	3	1	25	13
22	4	1	3	1	4	1	1	1	4	3	2	2	1	4	1	3	4	2	4	1	35	12
23	4	1	3	1	3	1	1	1	4	3	1	1	1	1	2	3	5	1	3	1	30	11
24	4	2	3	2	4	2	1	1	4	3	2	3	1	4	2	5	4	2	4	1	38	16
25	4	1	4	1	3	1	1	1	4	3	1	2	1	3	1	3	4	1	5	1	35	10
26	2	3	4	4	2	3	1	2	3	3	4	2	3	4	4	2	2	3	4	2	28	29
27	5	1	3	1	4	1	1	1	2	4	4	2	3	1	4	2	4	4	2	2	29	22
28	3	1	3	1	4	1	1	1	5	3	1	2	1	3	1	4	4	1	5	1	36	10
29	4	1	3	1	5	1	1	1	5	3	1	4	1	2	1	4	5	1	5	1	40	10
30	4	4	1	3	2	2	1	2	2	2	3	3	2	2	3	3	2	2	1	2	22	24
31	4	3	3	2	2	3	2	1	4	2	1	4	2	3	3	3	3	3	3	3	31	23
32	4	1	2	3	4	4	1	4	3	2	1	4	1	4	2	5	4	2	2	1	34	20
33	4	3	5	2	3	2	1	2	4	4	3	3	2	3	3	5	5	2	4	3	40	23
34	5	1	4	1	4	1	1	1	5	2	3	4	4	3	1	5	5	2	5	1	42	16
35	4	1	2	1	4	1	1	1	3	3	2	4	1	4	2	5	4	2	5	1	38	13
36	5	1	4	1	4	1	1	1	5	4	1	1	1	4	1	5	5	1	5	1	42	10
37	4	1	3	2	3	4	1	1	4	4	2	5	2	4	3	4	4	1	3	1	38	18
38	4	2	3	1	3	2	1	1	4	2	1	1	1	4	2	2	3	3	2	1	28	15
39	5	1	4	1	4	2	1	1	5	5	1	4	1	5	4	5	4	1	4	1	45	14
40	4	1	4	2	4	1	1	2	4	3	2	1	1	4	1	4	4	1	5	1	37	13
41	4	2	3	2	3	2	2	2	4	3	1	1	2	3	1	3	4	3	3	3	31	20
42	4	1	3	2	3	2	1	1	4	3	1	1	2	2	1	5	4	1	3	1	32	13
43	5	2	5	2	4	2	2	1	5	4	2	1	2	4	2	4	4	1	5	1	41	17
44	4	2	3	2	3	3	2	1	3	2	2	3	3	4	3	3	3	2	3	3	31	23
45	5	2	5	1	5	3	1	1	5	3	2	4	3	5	2	4	3	3	4	4	43	22
46	5	1	3	1	3	1	1	1	5	3	1	1	1	3	1	4	5	1	5	1	37	10
47	4	2	2	3	2	3	3	3	4	4	3	3	3	4	4	3	4	3	4	3	34	30
48	4	1	4	1	3	2	1	1	4	4	1	2	2	3	2	4	4	3	4	3	36	17
49	4	2	4	2	4	3	2	2	4	4	1	5	2	5	2	4	4	1	4	1	42	18
50	4	1	3	1	3	2	2	1	4	3	1	3	1	4	3	4	4	2	4	1	36	15
51	3	1	2	1	3	1	1	1	3	3	2	3	1	2	1	2	3	1	3	1	27	11
52	5	3	5	2	5	4	1	3	4	3	1	4	3	4	3	4	4	3	4	2	42	25
53	5	1	5	1	3	2	1	1	5	4	3	2	1	5	1	4	4	2	4	1	41	14
54	3	1	2	1	3	1	1	1	3	3	1	2	1	1	2	4	4	1	3	2	28	12
55	4	2	3	4	4	3	2	2	4	3	2	2	2	3	3	3	3	2	4	2	33	24
56	5	1	4	1	4	1	1	1	5	3	1	1	1	3	1	4	5	1	5	1	39	10
57	4	1	3	1	2	1	1	1	4	3	2	1	1	2	1	3	3	1	3	1	28	11
58	4	2	3	1	5	3	1	1	4	4	1	1	1	5	1	5	5	1	4	1	40	13
59	4	4	4	5	4	4	5	5	4	4	4	5	4	5	4	5	4	5	4	3	43	43
60	3	3	3	2	3	3	3	3	4	3	2	2	1	2	1	3	4	1	3	1	30	20
61	3	1	2	1	2	2	1	1	2	2	2	2	1	2	2	3	4	2	3	2	25	15
62	3	2	4	1	1	1	1	1	2	2	3	5	3	4	3	3	3	3	3	2	30	20
63	3	1	1	1	1	1	1	1	3	1	1	1	1	1	1	1	5	1	4	1	21	10
64	5	2	5	3	3	3	2	3	5	3	3	4	4	3	2	5	5	4	5	5	43	31
65	5	1	3	1	3	1	1	1	4	3	1	2	1	2	2	4	4	1	3	1	33	11
66	5	2	3	1	4	2	1	1	4	2	1	2	3	3	2	5	5	2	4	2	37	17
67	5	1	3	2	5	1	1	1	5	5	1	3	1	1	2	4	3	1	5	1	39	12
68	4	3	4	2	3	3	1	4	2	1	3	4	2	3	2	4	2	4	4	1	31	25
69																					0	0
70	4	2	5	5	2	2	2	2	5	4	2	4	1	1	3	3	3	1	5	1	36	21
71	5	1	3	3	2	1	2	1	2	1	1	1	1	3	3	3	3	3	3	3	26	19
72	5	3	5	4	4	4	4	3	5	5	4	5	4	5	5	5	5	3	4	2	48	36
73	4	1	2	1	3	1	1	1	3	3	1	1	1	3	1	3	4	1	5	1	31	10
74	3	2	3	1	3	1	1	1	3	2	1	3	1	3	1	4	2	1	4	1	30	11
75	4	3	3	2	4	1	1	1	5	4	1	1	1	3	3	4	3	2	4	1	35	16
76	4	1	4	1	4	1	1	1	4	4	1	1	1	5	2	3	4	2	4	1	37	12
77	4	1	3	2	4	2	1	1	3	3	2	2	1	3	2	4	4	1	5	1	35	14

## Sheet: Creativity self-efficacy
Number	1	2	3	4	average
1	4	5	4	4	4.25
2	4	4	3	4	3.75
3	6	6	6	6	6
4	7	5	6	6	6
5	4	5	5	3	4.25
6	5	3	2	5	3.75
7	4	5	5	4	4.5
8	4	5	5	5	4.75
9	4	5	4	4	4.25
10	5	7	5	5	5.5
11	6	6	2	5	4.75
12	7	7	1	5	5
13	5	5	6	5	5.25
14	6	5	7	6	6
15	6	6	6	6	6
16	3	3	3	3	3
17	6	6	4	5	5.25
18	5	6	5	4	5
19	3	3	4	3	3.25
20	3	4	5	4	4
21	2	2	2	2	2
22	5	5	4	5	4.75
23	4	3	4	4	3.75
24	6	6	4	5	5.25
25	7	7	6	6	6.5
26	3	3	2	3	2.75
27	4	6	4	4	4.5
28	4	7	7	4	5.5
29	6	7	4	5	5.5
30	5	4	3	4	4
31	5	4	5	4	4.5
32	7	6	7	7	6.75
33	4	4	3	4	3.75
34	7	7	7	7	7
35	5	6	7	6	6
36	7	7	5	7	6.5
37	4	2	5	5	4
38	2	2	2	1	1.75
39	5	5	6	5	5.25
40	5	6	6	5	5.5
41	5	6	4	5	5
42	3	4	4	4	3.75
43	6	7	2	6	5.25
44	3	5	4	4	4
45	6	6	6	5	5.75
46	7	6	6	6	6.25
47	3	4	3	3	3.25
48	4	5	5	4	4.5
49	5	5	4	5	4.75
50	6	5	6	6	5.75
51	5	6	6	5	5.5
52	4	6	6	4	5
53	4	4	5	4	4.25
54	2	2	3	3	2.5
55	3	4	3	3	3.25
56	4	4	4	4	4
57	4	4	3	4	3.75
58	4	6	5	4	4.75
59	5	5	3	3	4
60	6	6	5	4	5.25
61	7	6	7	7	6.75
62	4	3	5	3	3.75
63	2	4	4	3	3.25
64	1	2	2	2	1.75
65	7	4	4	4	4.75
66	7	5	4	6	5.5
67	4	1	1	7	3.25
68	3	4	4	5	4
69					0
70	7	4	1	3	3.75
71	1	1	1	1	1
72	7	5	6	5	5.75
73	4	5	6	5	5
74	5	5	4	5	4.75
75	5	5	5	6	5.25
76	5	5	6	5	5.25
77	6	7	5	6	6
